# Supplementary material for: SARS-CoV-2 transmission in an indoor mass-gathering live music event. A randomized clinical trial.
Source: Research Square preprint supplement (doi:10.21203/rs.3.rs-244584/v1), 2021-03-01
Supplement: Supplementary file 1 [file 594a30ecb7c50ffbb02f0aa8.docx]

**Supplementary Appendix 1.**

**Complete list of PRIMA-CoV-2 Study funders.**

Primavera Sound Group, with the collaboration of:

PLATINUM PATRONS:

- PRIMAVERA SOUND
- LAST TOUR
- LIVE NATION
- ICEC: DEPARTAMENT DE CULTURA. GENERALITAT DE CATALUNYA
- ICUB. AJUNTAMENT DE BARCELONA

GOLD PATRONS:

- SALA APOLO
- BRUNCH
- UNIVERSAL MUSIC GROUP
- GLOBAL TALENT SERVICES
- SONY MUSIC
- CRUILLA
- RAZZMATAZZ
- BARCELONA BEACH FESTIVAL
- JAGERMEISTER
- ELROW FAMILY
- MONEGROS DESERT FESTIVAL

SILVER PATRONS:

- THE WILD SEEDS
- SGAE
- VAMPIRE
- BSM. AJUNTAMENT DE BARCELONA
- SALA ZERO
- PALM FEST
- TICKETMASTER
- RECUP
- TALLER DE MUSICS
- MADNESS LIVE!

CONTRIBUTOR:

- FUNDACIÓ BANC SABADELL

#Yomecorono Initiative (<https://www.yomecorono.com/>), Barcelona, Spain
