# Supplementary material for: SARS-CoV-2 transmission in an indoor mass-gathering live music event. A randomized clinical trial.
Source: Research Square preprint supplement (doi:10.21203/rs.3.rs-244584/v1), 2021-03-01
Supplement: Supplementary file 2 [file c203559b93f077ad815bba85.docx]

**Supplementary Appendix 1. Inclusion and exclusion criteria of participants. PRIMA-CoV study**

**Inclusion criteria**

- Adults (aged 18-59 years old) interested in attending the programmed music event who agree to participate in the initial study having signed the informed consent, including explicit acceptance of the measures implemented for the reduction of the risk of contagion of SARS-CoV-2.
- Negative antigen test via nasopharyngeal swab during the 12-24h prior to the event,

**Exclusion criteria**

People attending who present one of the following comorbidities will be excluded:

- Hypertension
- Diabetes Mellitus.
- Ischemic heart disease.
- Any type of Cancer undergoing treatment.
- Chronic lung diseases such as COPD and Asthma.
- Those who have a positive test for the detection of SARS-CoV-2 via the rapid antigen test in the initial screening
- Those who present a body temperature higher than 37.0º C on the same day as the event, during the carrying out of the antigen test
- Those who have had a confirmed diagnosis of SARS-CoV-2 in the two weeks prior to the event
- Those who refer to any symptomatology suggestive of an infection of SARS-CoV-2 in the 10 days prior to the study
- Those who refer to having had contact with a person with a confirmed diagnosis of SARS-CoV-2 during the two weeks prior to the event

The participants with a negative result in this first test agree to realize a new nasopharyngeal swab and test for SARS-CoV-2, 8 days after the event and to respond to a survey in an app, installed on their mobile phone, after 10 days.
